# Supplementary material for: A simple fabrication of high efficiency planar perovskite solar cells: controlled film growth with methylammonium iodide and green antisolvent sec-butyl alcohol
Source: Royal Society of Chemistry journal article supplement (doi:10.1039/d0tc02535f), 2020-01-01
Supplement: d0tc02535f1.pdf [file d0tc02535f1.pdf]

# **Simple Fabrication of High Efficiency Planar Perovskite Solar Cells: Controlled Film Growth with Methylammonium Iodide and Green Antisolvent Sec-Butyl Alcohol**

Linlin Qiu<sup>1</sup>, Lika Dong<sup>1</sup>, Deqiang Mei<sup>1</sup>, Wei-Hsiang Chen<sup>4</sup>, Pei-Cheng Jiang<sup>5</sup>, Lixin Song<sup>1,2</sup>,  
Jieqiong Wang<sup>1</sup>, Jiacheng Zou<sup>1</sup>, Pingfan Du<sup>1,2,3,\*</sup> and Jie Xiong<sup>1,2,\*</sup>

<sup>1</sup> *College of Textile Science and Engineering, Zhejiang Sci-Tech University, Hangzhou 310018, PR  
China*

<sup>2</sup> *Key Laboratory of Advanced Textile Materials and Manufacturing Technology (Ministry of  
Education), Zhejiang Sci-Tech University, Hangzhou 310018, PR China*

<sup>3</sup> *Zhejiang Provincial Key Laboratory of Fiber Materials and Manufacturing Technology, Zhejiang  
Sci-Tech University, Hangzhou 310018, PR China*

<sup>4</sup> *School of Science, Huzhou University, Huzhou 313000, Zhejiang, P. R. China*

<sup>5</sup> *Institute of Physics, Academia Sinica, Taipei 11529, Taiwan*

\*Corresponding authors. Tel.: +86 571 86849370; fax: +86 571 86843603.

E-mail addresses: dupf@zstu.edu.cn (P. Du); jxiong@zstu.edu.cn (J. Xiong).

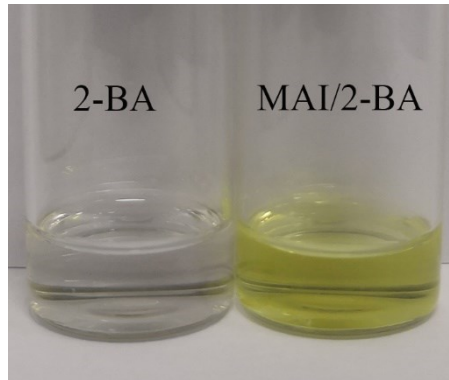

**Figure S1.** The photograph of the 2-BA solution and MAI/2-BA solution.

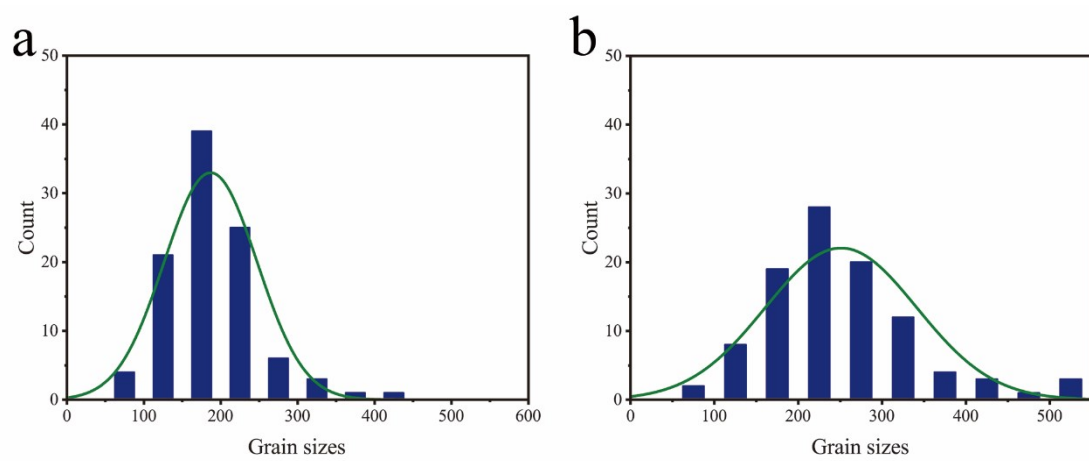

**Figure S2.** The grain sizes distribution statistics corresponding to Figure 2a and c.

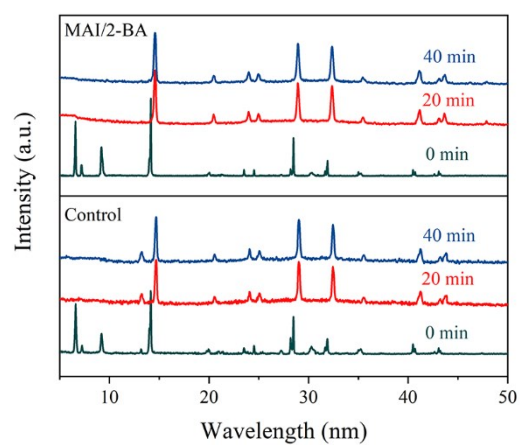

**Figure S3.** The XRD patterns of perovskite films under different annealing time.

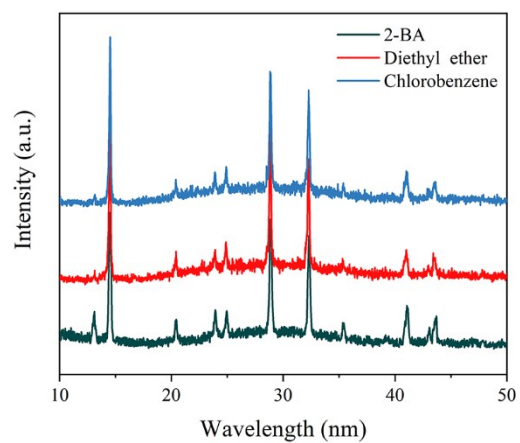

**Figure S4.** The XRD patterns of perovskite films fabricated by anti-solvent 2-BA, diethyl ether and chlorobenzene, respectively.

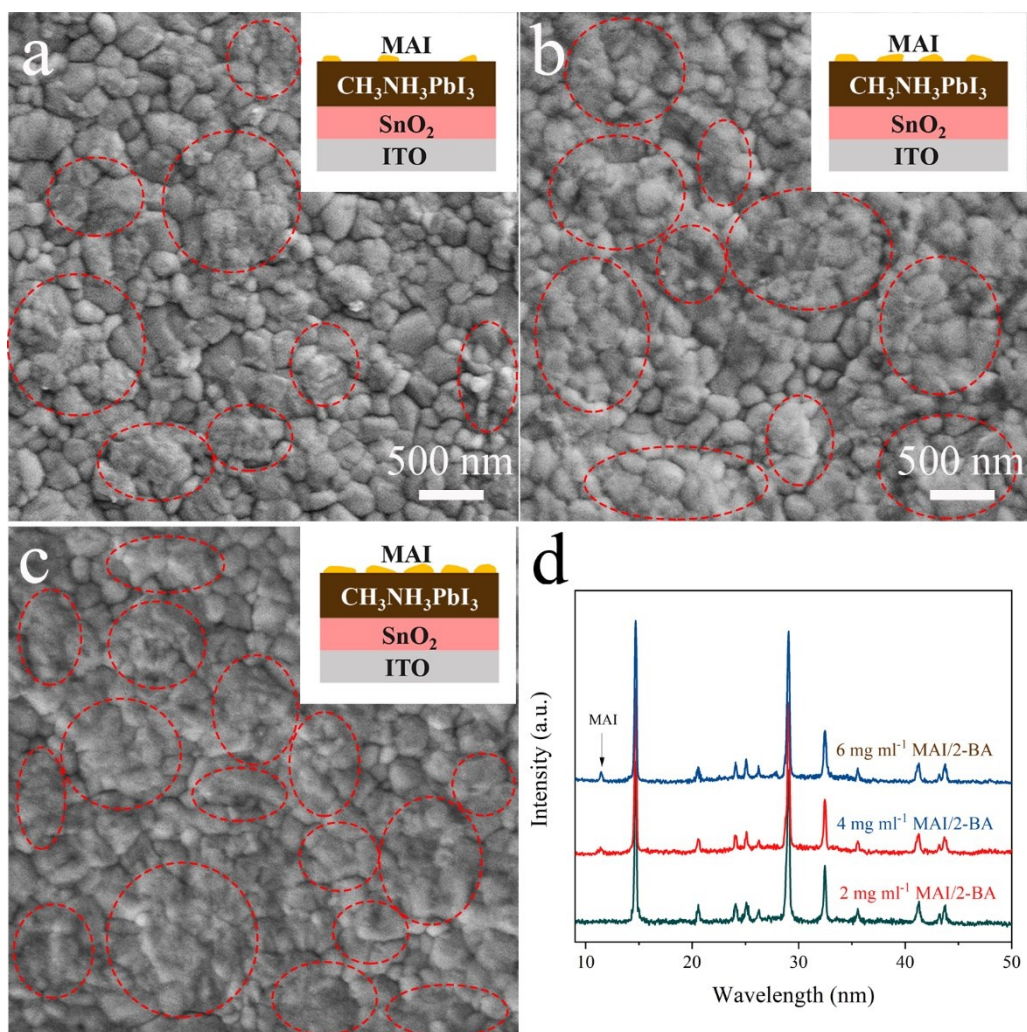

**Figure S5.** SEM top-view image of perovskite films treated by high concentration MAI/2-BA: (a) 2 mg ml<sup>-1</sup>, (b) 4 mg ml<sup>-1</sup> and (c) 6 mg ml<sup>-1</sup>; (d) The XRD patterns of perovskite films treated by high concentration MAI/2-BA.

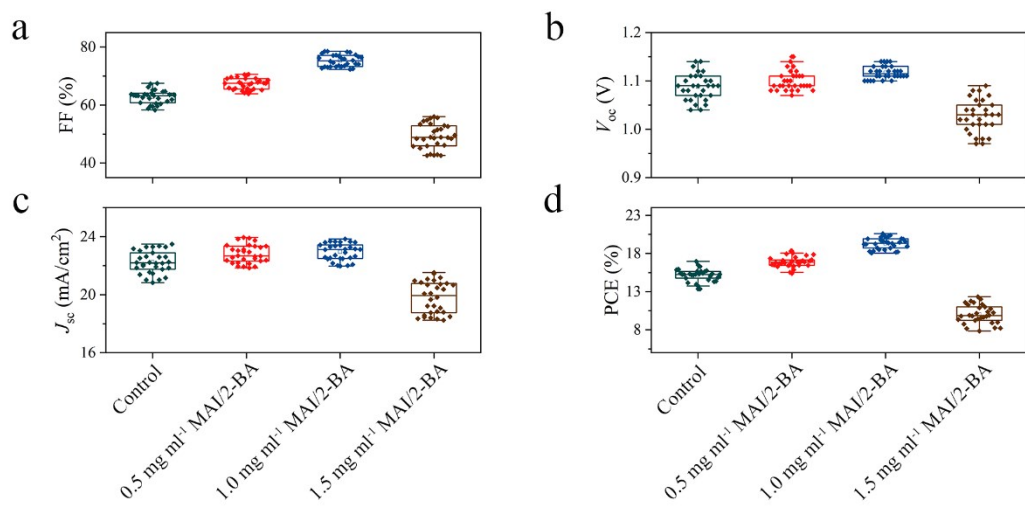

**Figure S6.** Statistical device performance of PSCs treated with the 2-BA, 0.5 mg ml<sup>-1</sup> of MAI/2-BA, 1 mg ml<sup>-1</sup> of MAI/2-BA and 1.5 mg ml<sup>-1</sup> of MAI/2-BA

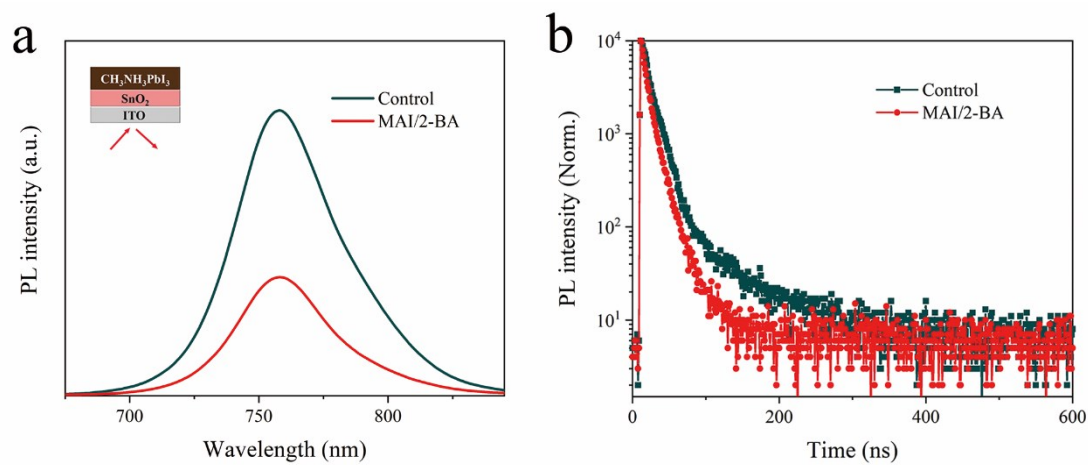

**Figure S7.** The PL and TRPL spectra of the as-obtained perovskite films, the inset displays the device structure.

**Table S1.** The full photovoltaic parameters for fabricated PSCs corresponding to Figure 4b.

| Sample                           | $J$ (mA/cm <sup>2</sup> ) | $V$ (V)   | FF (%)   | PCE (%)    |
|----------------------------------|---------------------------|-----------|----------|------------|
| Control                          | 22.16±1.33                | 1.09±0.05 | 62.9±4.6 | 15.16±1.80 |
| average value                    | 22.24                     | 1.09      | 62.80    | 15.18      |
| 0.5 mg ml <sup>-1</sup> MAI/2-PA | 22.90±1.05                | 1.11±0.04 | 67.3±3.4 | 16.85±1.47 |
| average value                    | 22.80                     | 1.10      | 67.25    | 16.87      |
| 1 mg ml <sup>-1</sup> MAI/2-PA   | 22.91±0.94                | 1.12±0.02 | 75.4±3.1 | 19.32±1.27 |
| average value                    | 22.95                     | 1.12      | 75.30    | 19.31      |
| 1.5 mg ml <sup>-1</sup> MAI/2-PA | 18.94±2.60                | 1.03±0.06 | 49.3±6.7 | 10.09±2.24 |
| average value                    | 19.74                     | 1.03      | 49.20    | 9.99       |

**Table S2.** The detailed fitting internal series resistance ( $R_s$ ) and recombination resistance ( $R_{ct}$ ) for PSCs treated with the 2-BA and MAI/2-BA

| Sample   | $R_s$ ( $\Omega$ ) | $R_{ct}$ ( $\Omega$ ) |
|----------|--------------------|-----------------------|
| Control  | 21.5               | 22490.7               |
| MAI/2-PA | 18.4               | 33035.5               |

**Table S3.** Fitted parameters of TRPL spectra corresponding to Figure 4d.

| Sample   | $A_1$ (%) | $\tau_1$ (ns) | $A_2$ (%) | $\tau_2$ (ns) | $\tau_{avg}$ (ns) |
|----------|-----------|---------------|-----------|---------------|-------------------|
| Control  | 76        | 3.6           | 24        | 14.8          | 9.2               |
| MAI/2-PA | 69        | 7.8           | 31        | 42.4          | 25.1              |

**Table S4.** Fitted parameters of TRPL spectra corresponding to Figure S7.

| Sample   | $A_1$ (%) | $\tau_1$ (ns) | $A_2$ (%) | $\tau_2$ (ns) | $\tau_{avg}$ (ns) |
|----------|-----------|---------------|-----------|---------------|-------------------|
| Control  | 76        | 11.6          | 24        | 46.2          | 28.9              |
| MAI/2-PA | 79        | 7.6           | 21        | 20.6          | 14.1              |
